# Supplementary material for: Polyphenolic carbosilane dendrimers as anticancer agents against prostate cancer
Source: Royal Society of Chemistry journal article supplement (doi:10.1039/c6nj02545e), 2016-01-01

## New J Chem

### SUPPLEMENTARY INFORMATION

#### POLYPHENOLIC CARBOSILANE DENDRIMERS AS ANTICANCER

#### AGENTS AGAINST PROSTATE CANCER

Gabriel Mencia,<sup>1</sup> Natalia Sanz del Olmo,<sup>1</sup> Laura Muñoz,<sup>2</sup> Marta Maroto,<sup>1</sup> Rafael Gomez,<sup>1</sup> Paula Ortega,\*<sup>1</sup> M<sup>a</sup> José Carmena,\*<sup>2</sup> F. Javier de la Mata.\*<sup>1</sup>

<sup>1</sup> Departamento de Química Orgánica y Química Inorgánica. Universidad de Alcalá, Campus Universitario, E-28871 Alcalá de Henares (Spain).- Networking Research Center on Bioengineering, Biomaterials and Nanomedicine (CIBER-BBN), Spain. October, 2016.

<sup>2</sup> Departamento de Biología de Sistemas. Universidad de Alcalá, Campus Universitario, E-28871 Alcalá de Henares (Spain)

#### Table of Contents

- **Figure S1.** <sup>1</sup>H and <sup>13</sup>C-NMR spectra of dendrimer [G0(N=CH(C<sub>6</sub>H<sub>4</sub>(OMe)(OH))<sub>4</sub>](**2**)
- **Figure S2.** <sup>1</sup>H-NMR and <sup>13</sup>C-NMR spectra of Et<sub>3</sub>Si(CH<sub>2</sub>)<sub>3</sub>NHCH<sub>2</sub>Ph(OMe)(OH) (**4**)
- **Figure S3.** ESI-TOF of Et<sub>3</sub>Si(CH<sub>2</sub>)<sub>3</sub>NHCH<sub>2</sub>Ph(OMe)(OH) (**4**)
- **Figure S4.** [M+H]<sup>+</sup> peak in the mass spectrum of G0-[Si(CH<sub>2</sub>)<sub>3</sub>NHCH<sub>2</sub>Ph(OMe)(OH)]<sub>4</sub> (**5**)
- **Figure S5.** <sup>1</sup>H- (A) and <sup>13</sup>C-NMR (B) spectra of G0-[Si(CH<sub>2</sub>)<sub>3</sub>NHCH<sub>2</sub>Ph(OMe)(OH)]<sub>4</sub> (**5**) in CDCl<sub>3</sub>
- **Figure S6.** <sup>1</sup>H-NMR in CDCl and ESI-TOF of G1-[Si(CH<sub>2</sub>)<sub>3</sub>NHCH<sub>2</sub>Ph(OMe)(OH)]<sub>8</sub> (**6**).

- **Figure S7.**  $^1\text{H}$ - and  $^{13}\text{C}$ -NMR spectra of G0-  
 $[\text{Si}(\text{CH}_2)\text{N}^+\text{H}_2\text{CH}_2\text{Ph}(\text{OMe})(\text{OH})\text{Cl}^-]_4$  (**8**) in  $\text{DMSO-}d_6$ .
- **Figure S8.**  $^1\text{H}$ - and  $^{13}\text{C}$ -NMR spectra of G1-  
 $[\text{Si}(\text{CH}_2)\text{N}^+\text{H}_2\text{CH}_2\text{Ph}(\text{OMe})(\text{OH})\text{Cl}^-]_8$  (**9**) in  $\text{DMSO-}d_6$

**Figure S1 .**  $^1\text{H}$  and  $^{13}\text{C}$ -NMR spectrum of dendrimer  $[\text{G}_0(\text{N}=\text{CH}(\text{C}_6\text{H}_4(\text{OMe})(\text{OH}))_4)]_2$  (2)

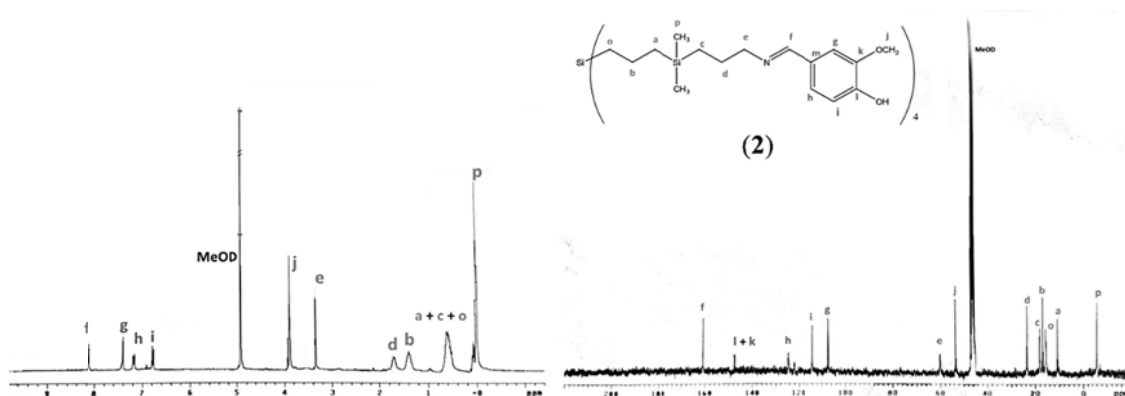

**Figure S2.**  $^1\text{H}$ - (A) and  $^{13}\text{C}$ -NMR (B) spectra of  $\text{Et}_3\text{Si}(\text{CH}_2)_3\text{NHCH}_2\text{Ph}(\text{OMe})(\text{OH})$  (4)

A)

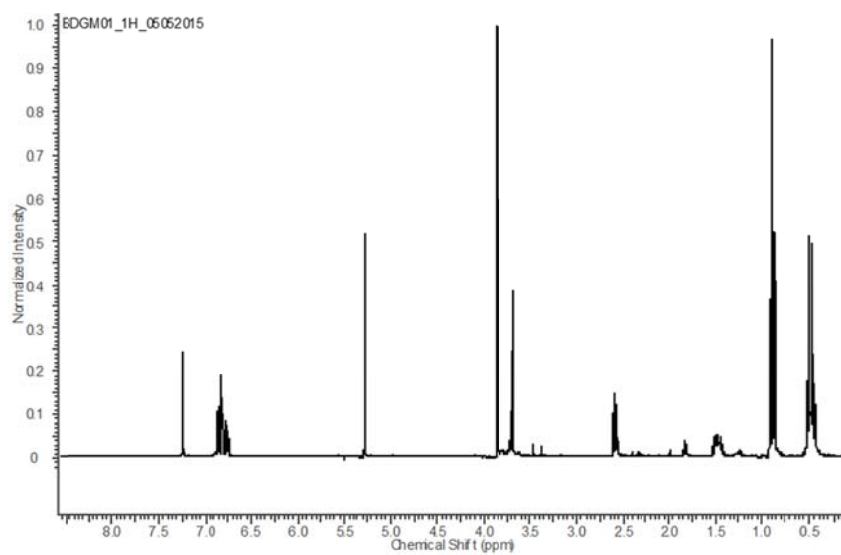

B)

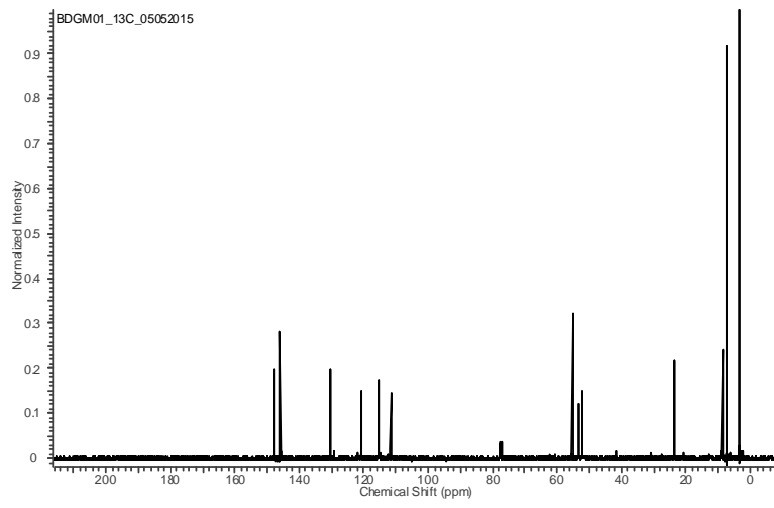

**Figure S3** ESI-TOF of  $\text{Et}_3\text{Si}(\text{CH}_2)_3\text{NHCH}_2\text{Ph}(\text{OMe})(\text{OH})$  (**4**)

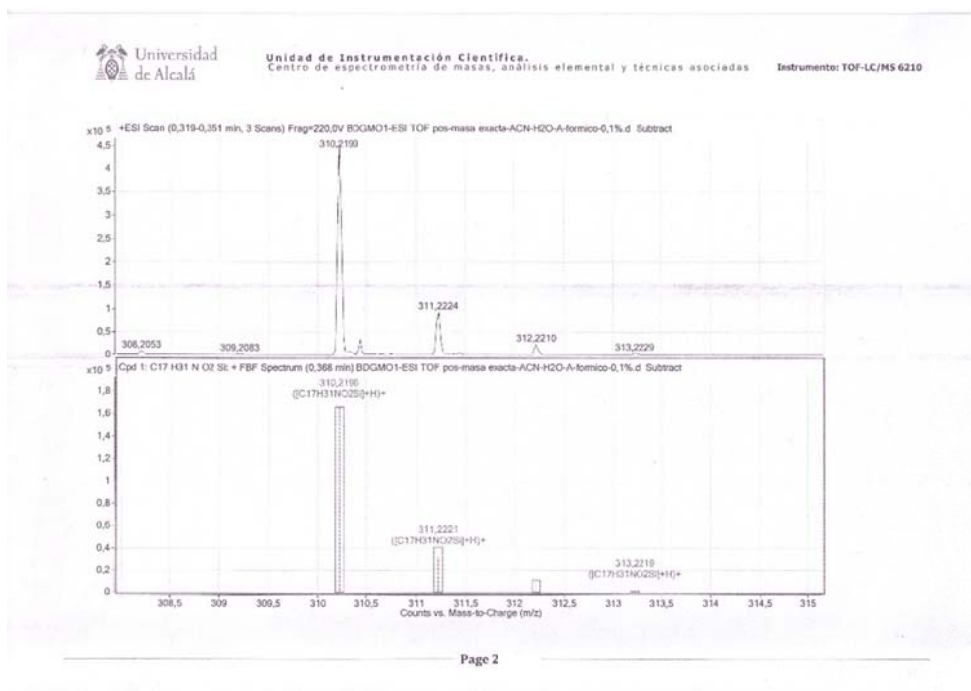

**Figure S4.**  $[\text{M}+\text{H}]^+$  peak in the mass spectrum of  $\text{G0-}[\text{Si}(\text{CH}_2)_3\text{NHCH}_2\text{Ph}(\text{OMe})(\text{OH})]_4$  (**5**).

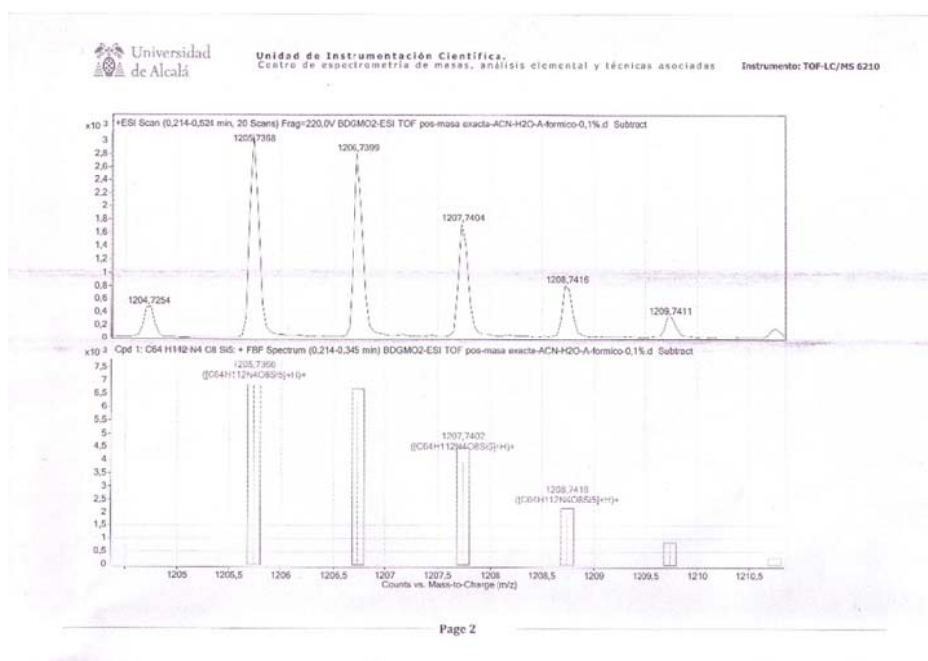

**Figure S5.**  $^1\text{H}$ - (A) and  $^{13}\text{C}$ -NMR (B) spectra of  $\text{G0-}[\text{Si}(\text{CH}_2)_3\text{NHCH}_2\text{Ph}(\text{OMe})(\text{OH})]_4$  (**5**) in  $\text{CDCl}_3$

A)

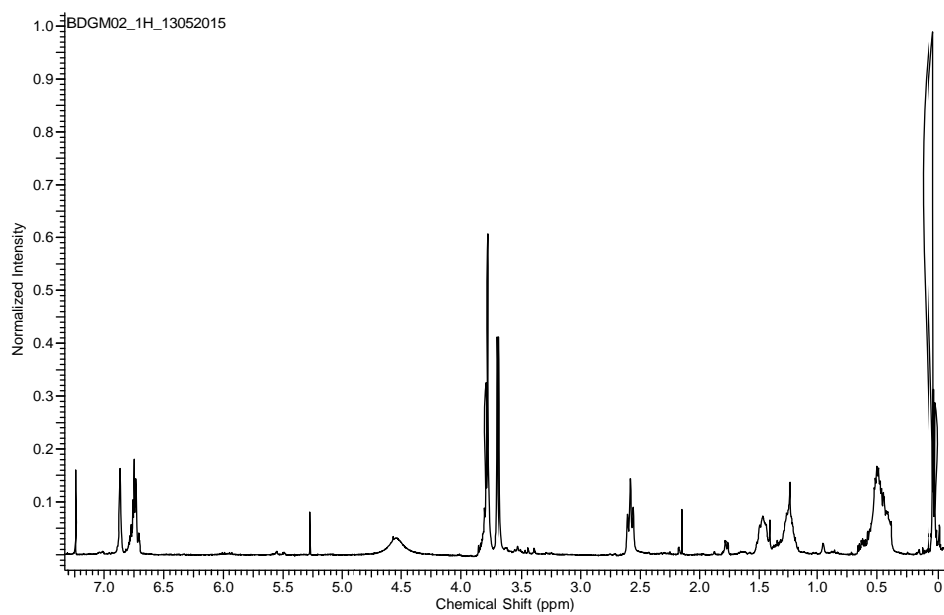

B)

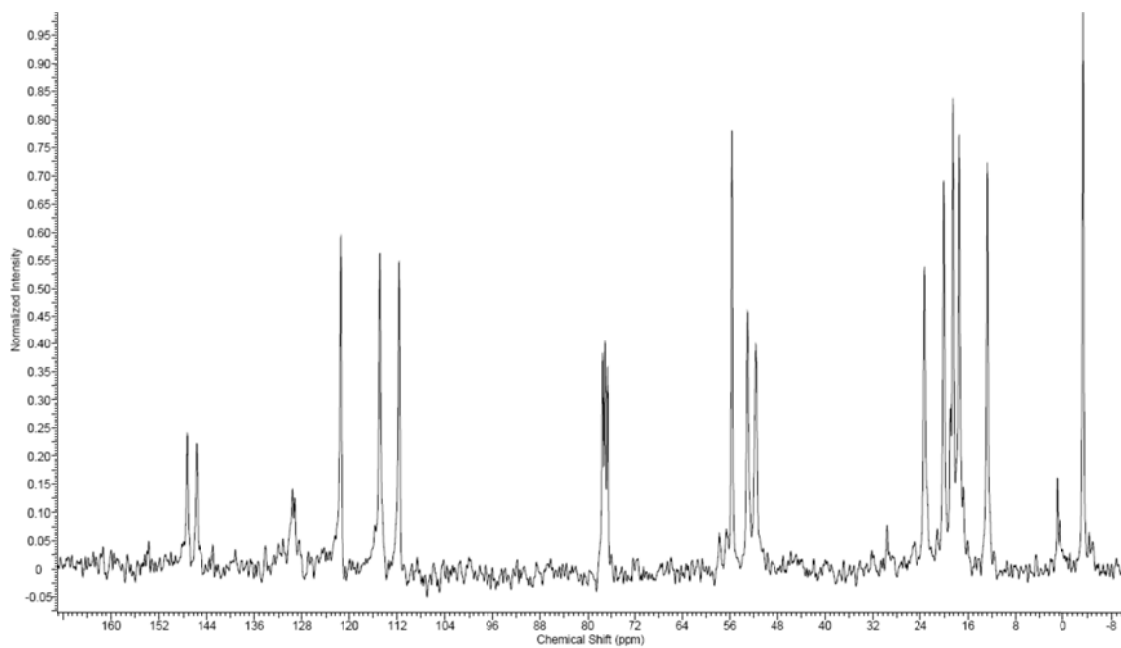

**Figure S6.** A)  $^1\text{H-NMR}$  in  $\text{CDCl}_3$  and B) ESI-TOF of  $\text{G1-}[\text{Si}(\text{CH}_2)_3\text{NHCH}_2\text{Ph}(\text{OMe})(\text{OH})]_8$  (**6**)<sub>3</sub>

A)

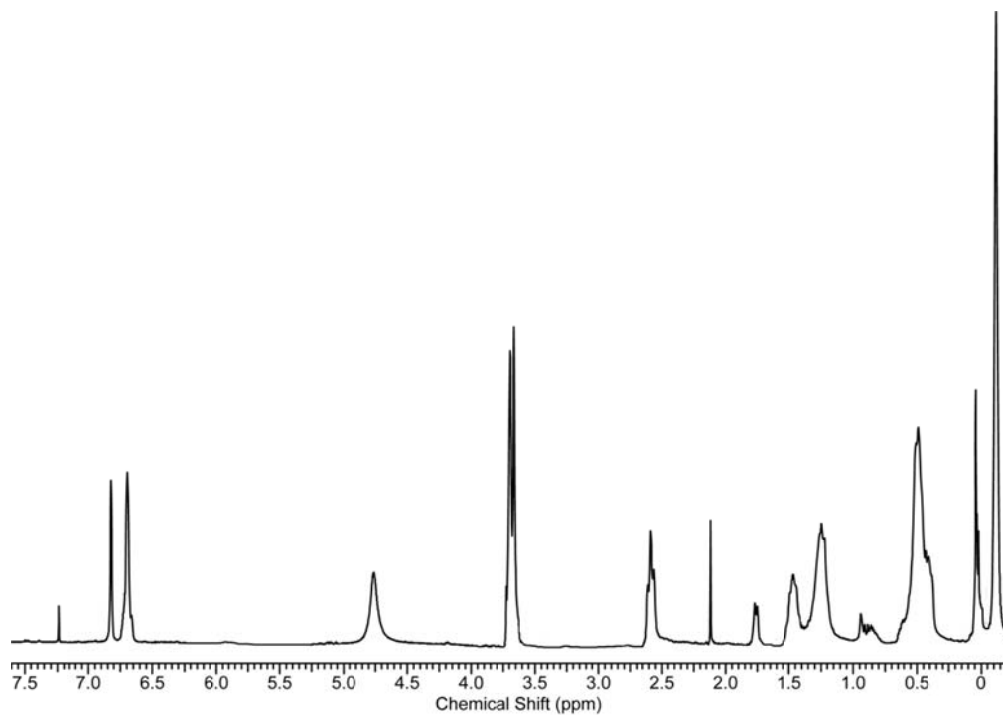

B)

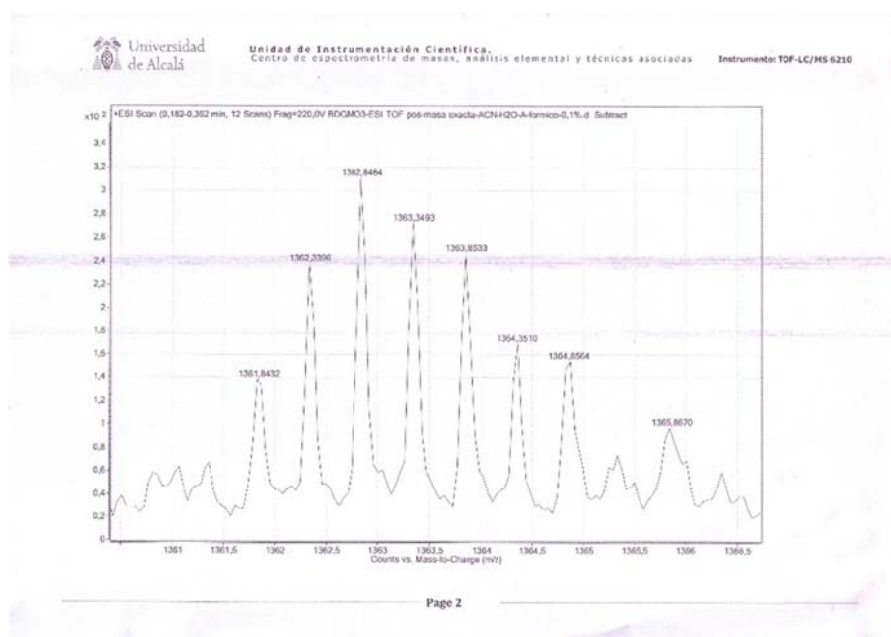

**Figure S7.**  $^1\text{H}$ - (A) and  $^{13}\text{C}$ -NMR (B) spectra of  $\text{G0-}[\text{Si}(\text{CH}_2)\text{N}^+\text{H}_2\text{CH}_2\text{Ph}(\text{OMe})(\text{OH})\text{Cl}]_4$  (**8**) in  $\text{DMSO-}d_6$

A)

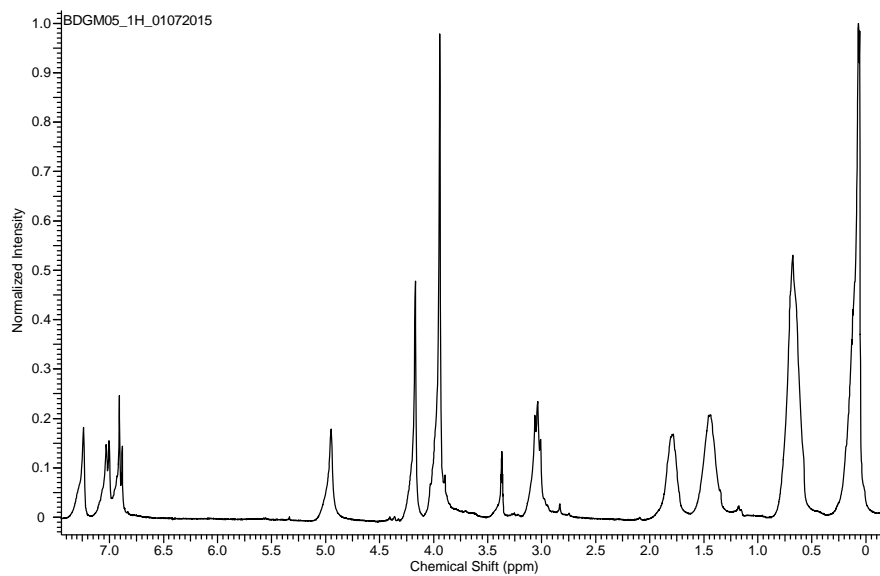

B)

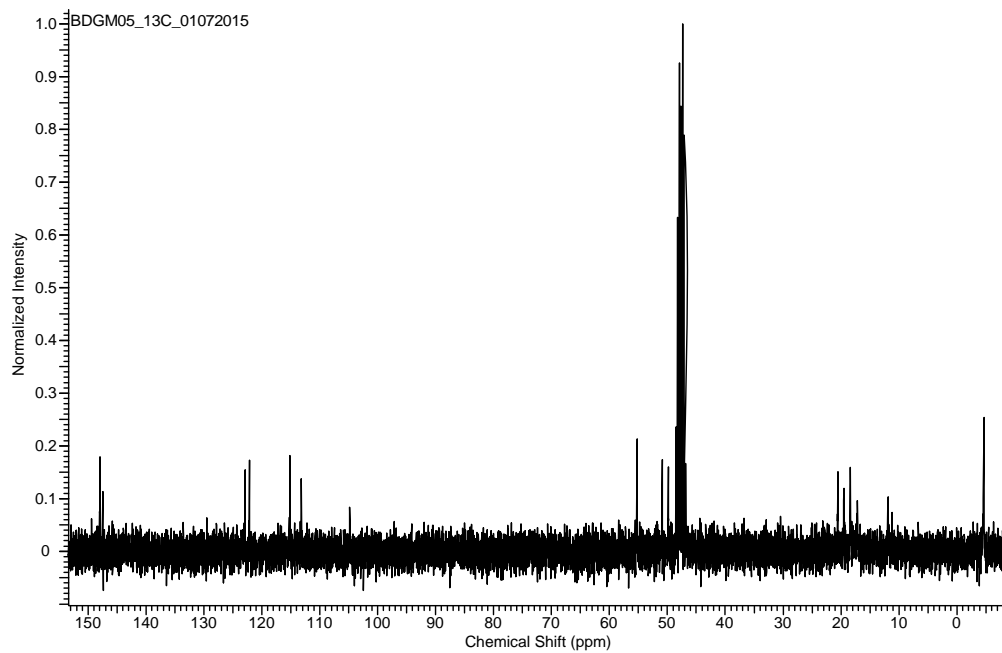



**Figure S8.**  $^1\text{H}$ - (A) and  $^{13}\text{C}$ -NMR (B) spectra of  $\text{G1-}[\text{Si}(\text{CH}_2)\text{N}^+\text{H}_2\text{CH}_2\text{Ph}(\text{OMe})(\text{OH})\text{Cl}]_8$  (**9**) in  $\text{DMSO-}d_6$

A)

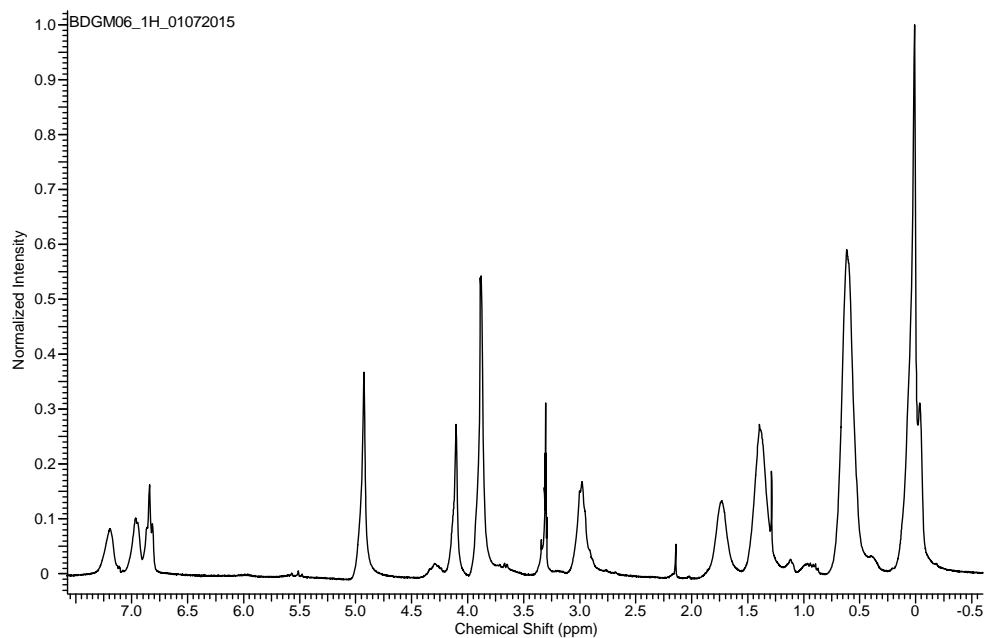

B)

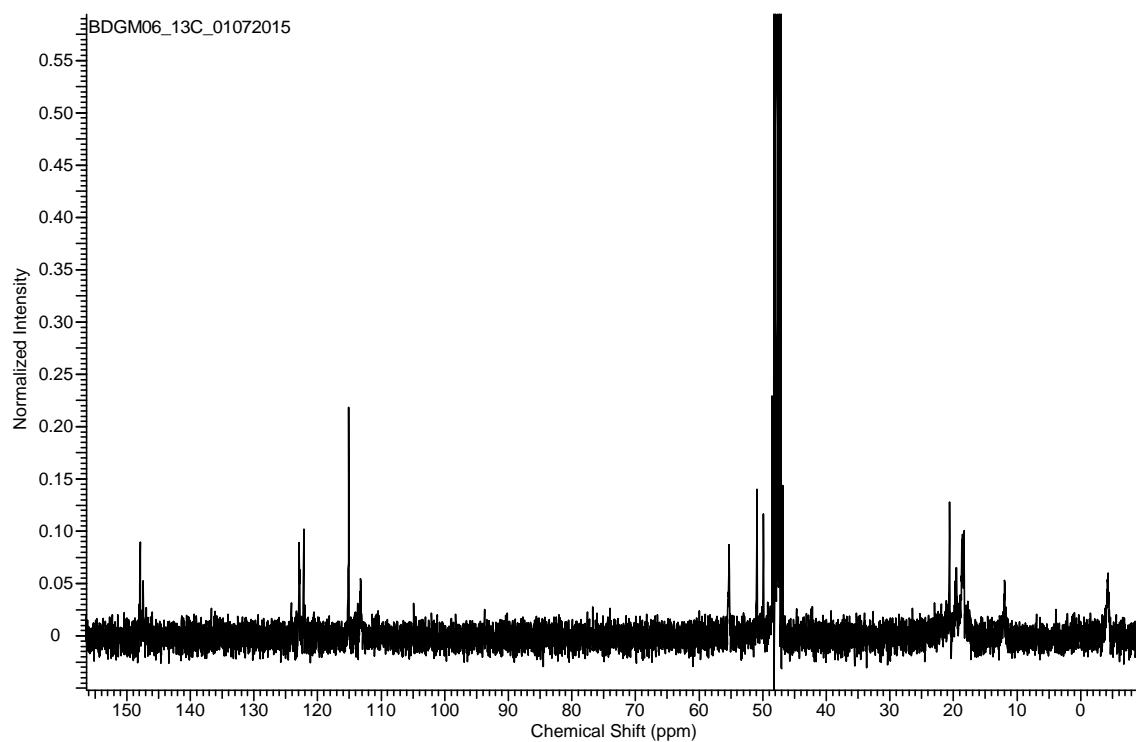

Supplement: c6nj02545e1.pdf [file c6nj02545e1.pdf]
